# Supplementary material for: Innovative chromene-based disperse dyes for concurrent dyeing: molecular docking, biochemical assessment, and repellent efficacy against Culex pipiens mosquitoes
Source: Royal Society of Chemistry journal article supplement (doi:10.1039/d5ma01162k), 2025-12-09
Supplement: d5ma01162k1.pdf [file d5ma01162k1.pdf]

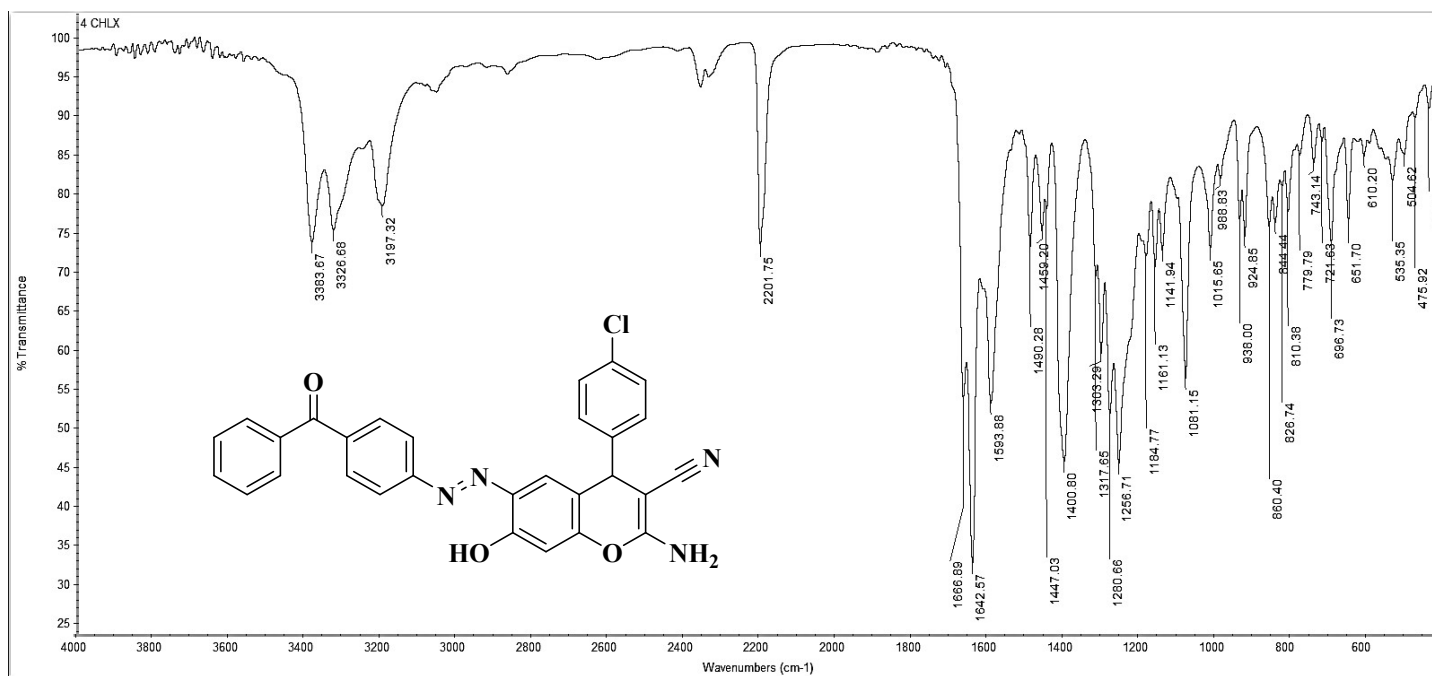

**Figure S1: FTIR of compound 6a**

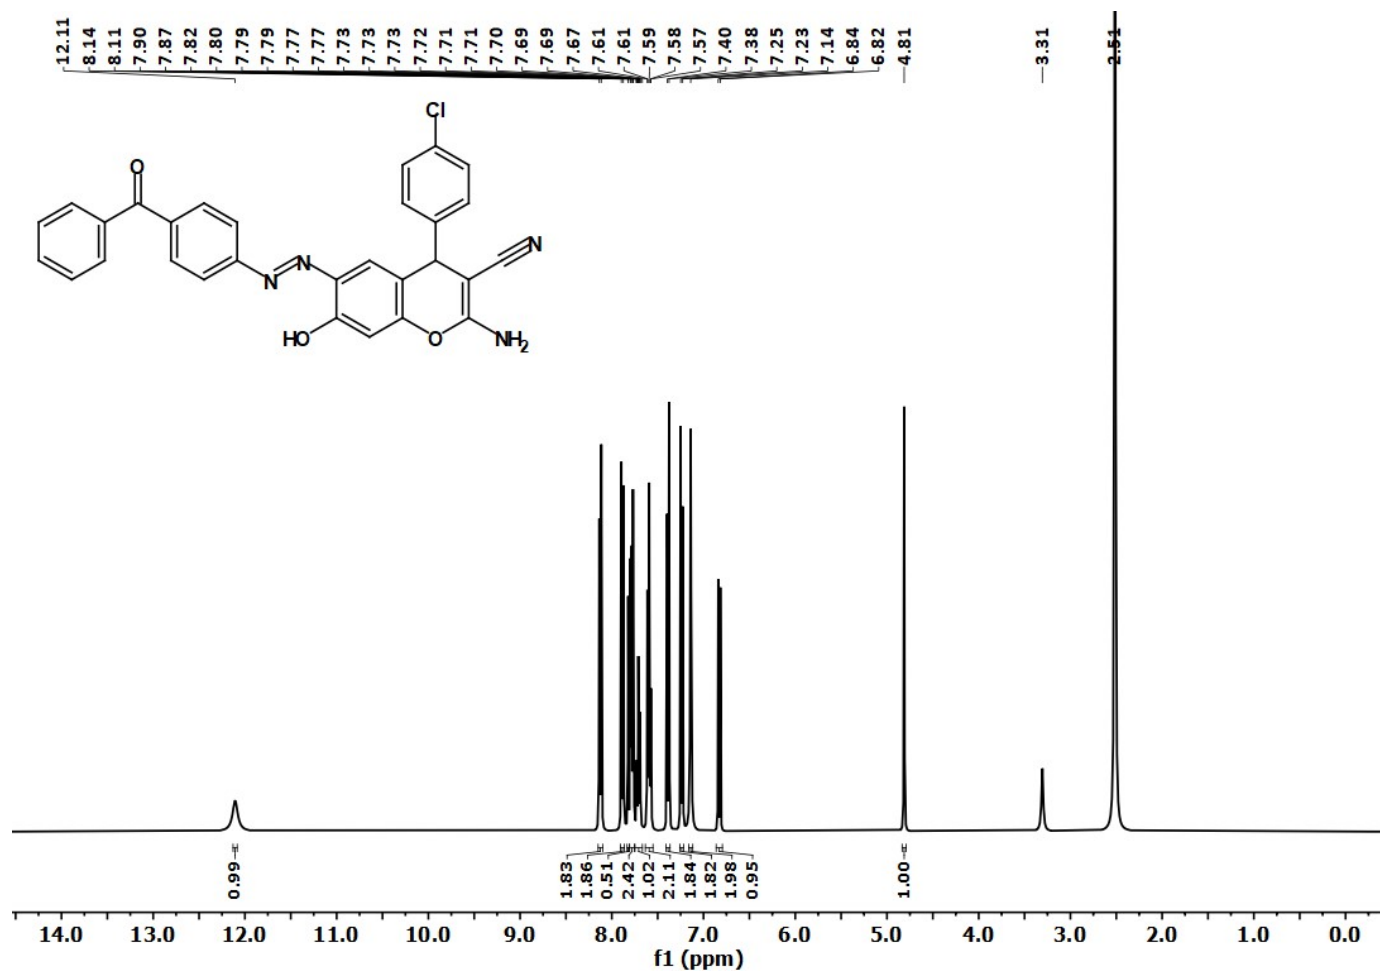

Figure S2: <sup>1</sup>H NMR (DMSO-d<sub>6</sub>) of compound 6a

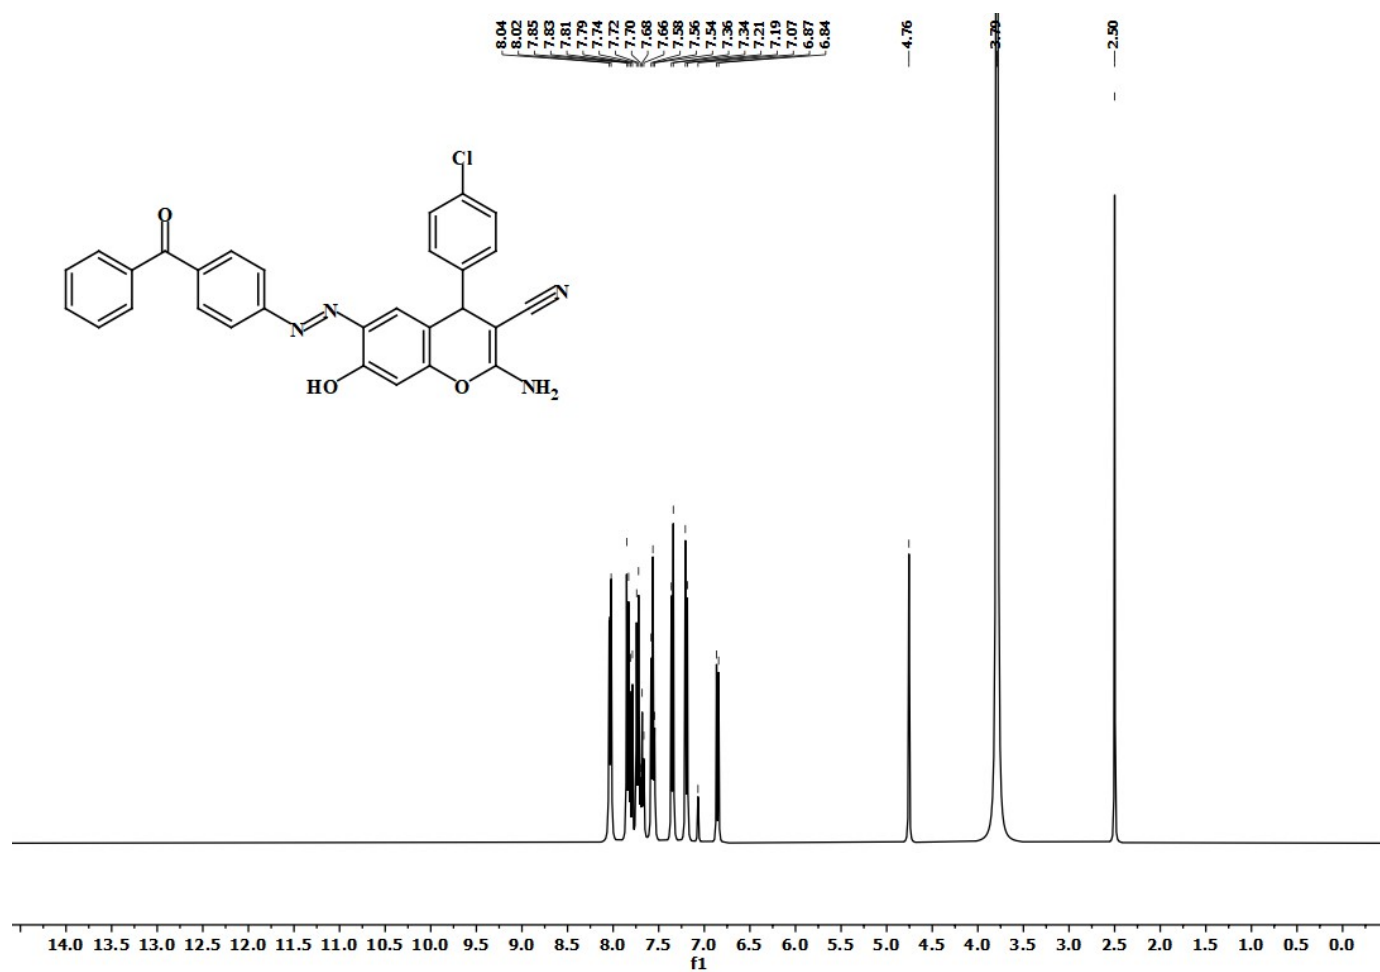

**Figure S3: <sup>1</sup>H NMR/D<sub>2</sub>O (DMSO-d<sub>6</sub>) of compound 6a**

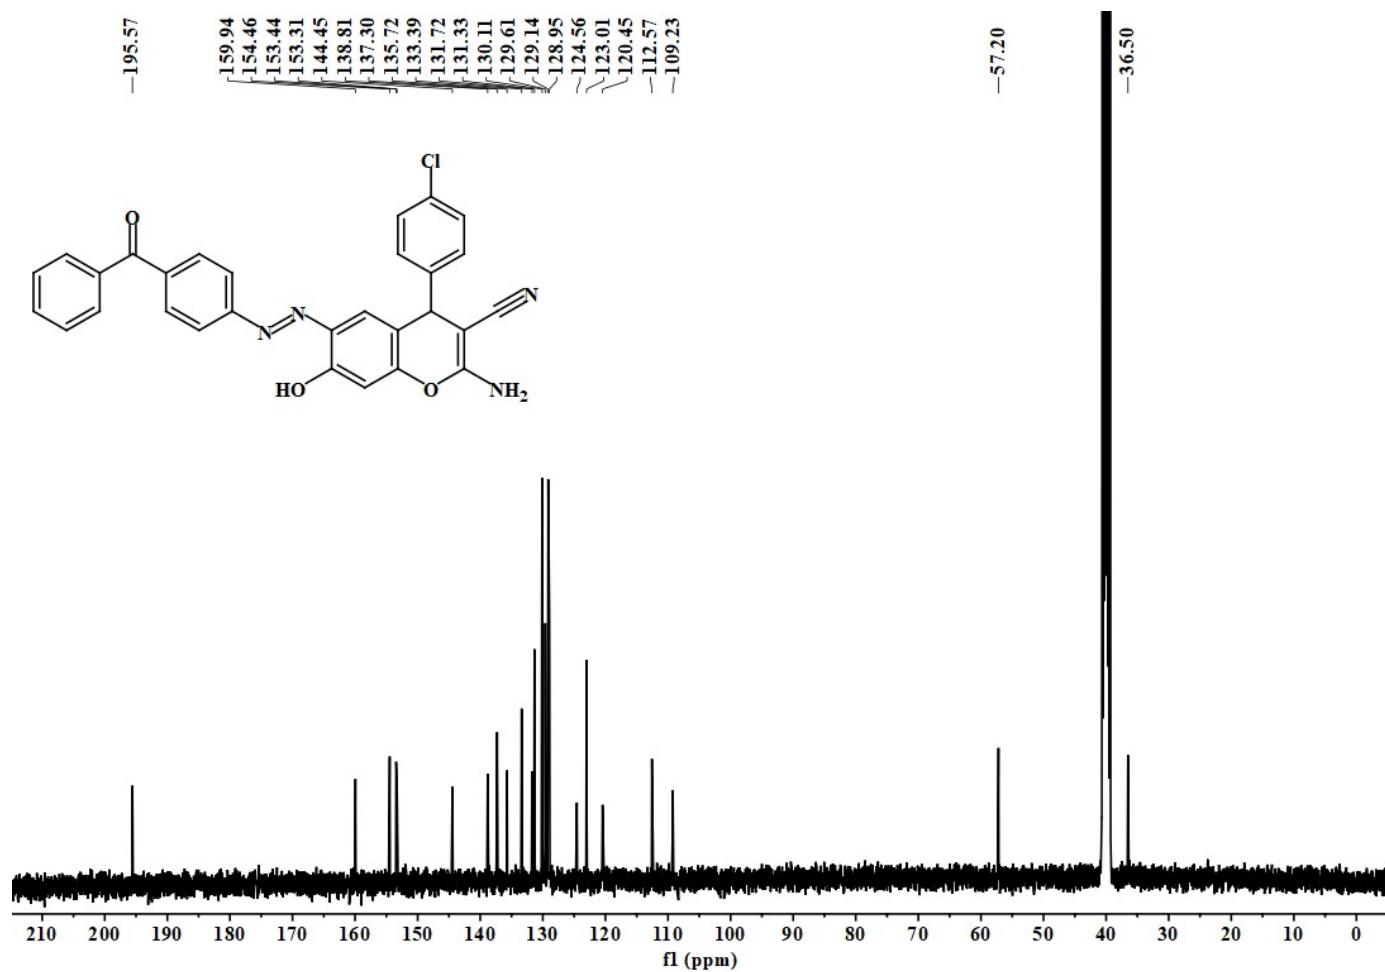

Figure S4: <sup>13</sup>C H NMR (DMSO-d<sub>6</sub>) of compound 6a

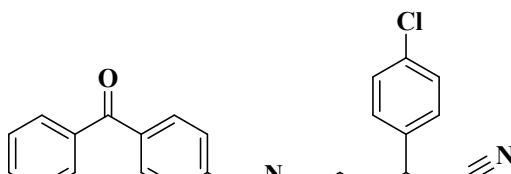

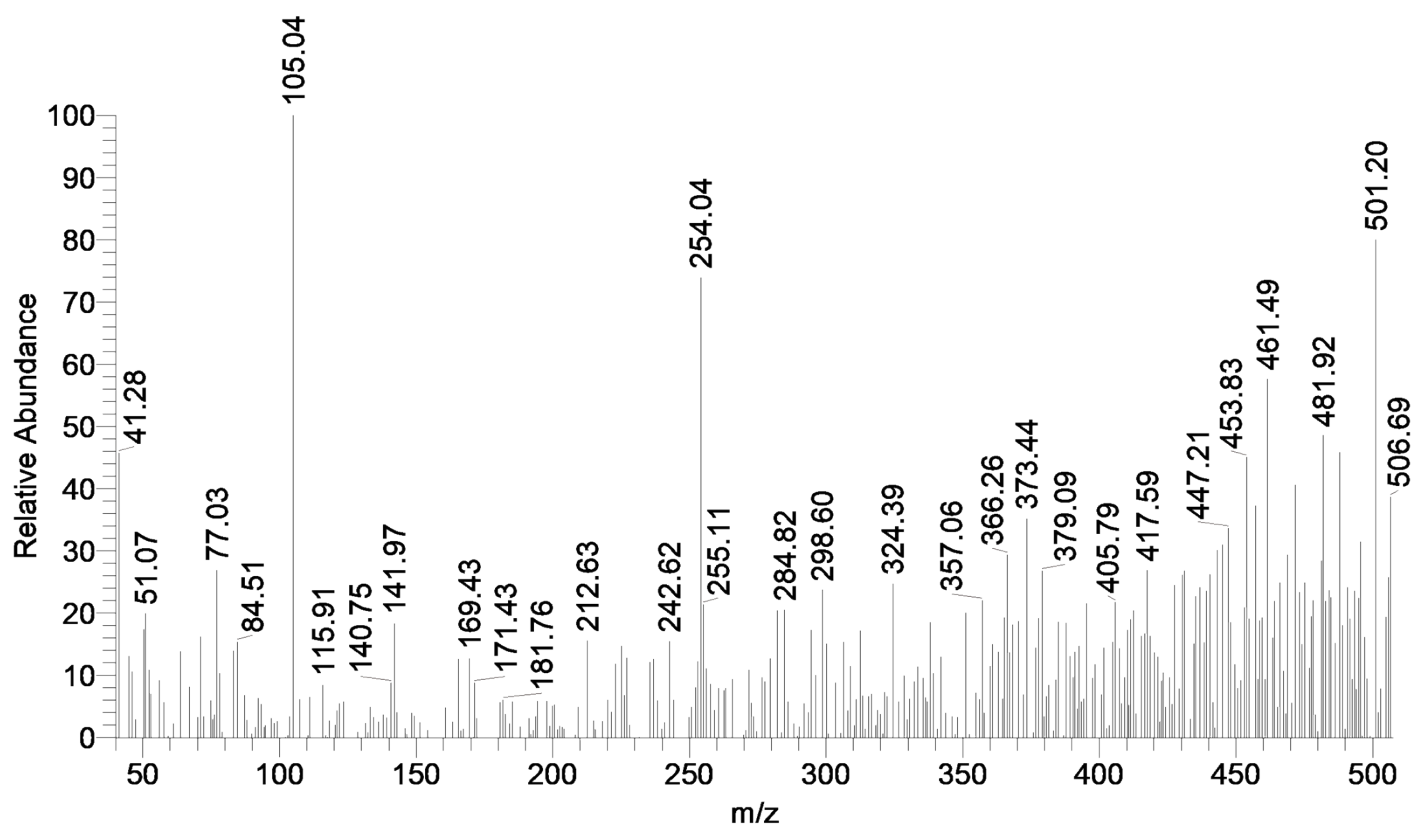

**Figure S5: Mass spectrum of compound 6a**



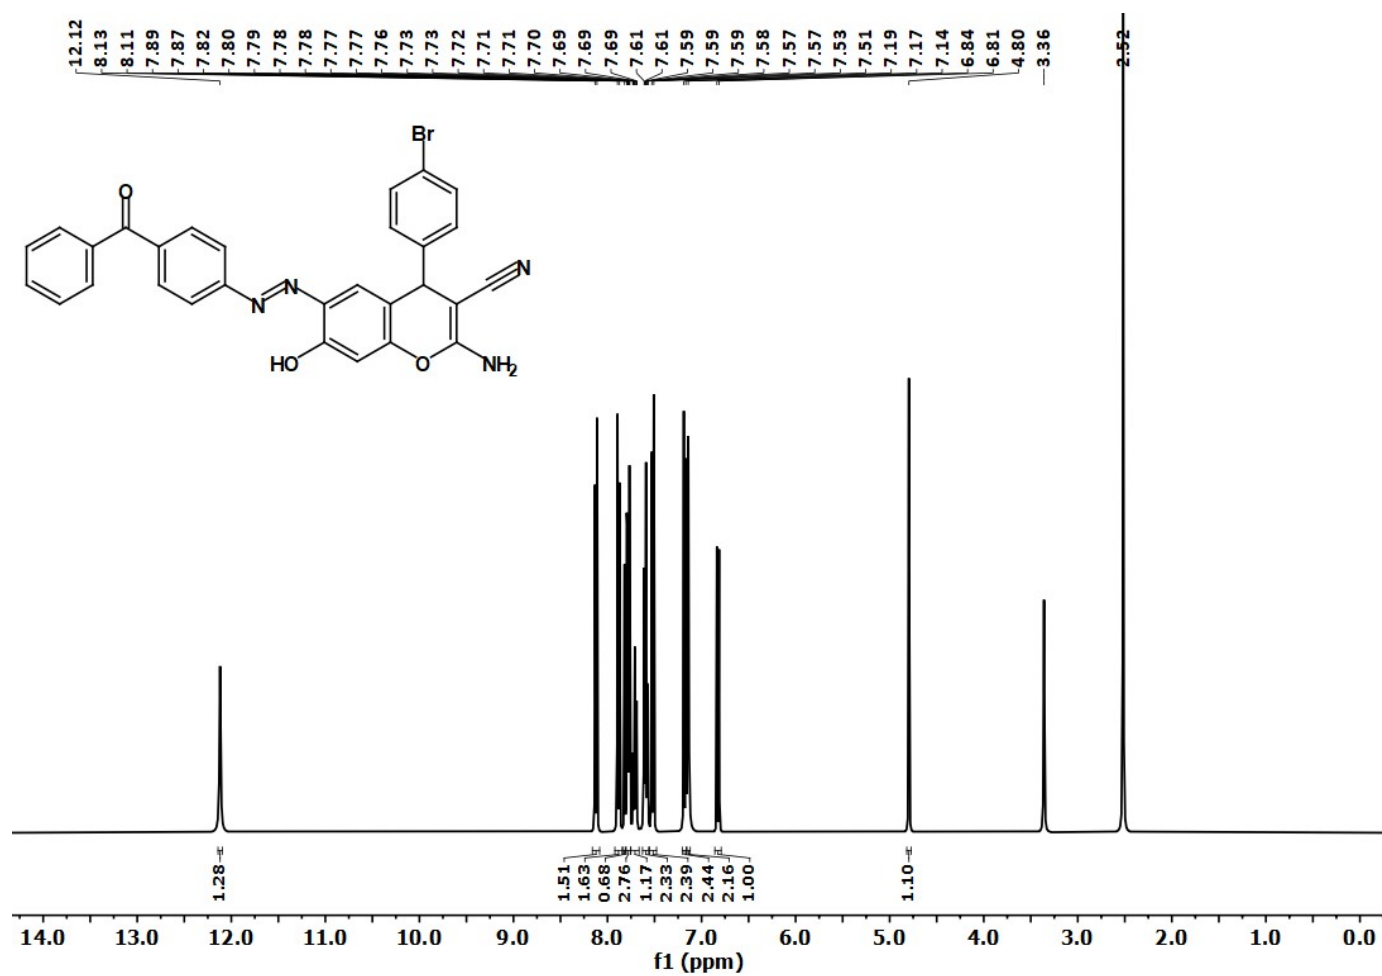

Figure S7: <sup>1</sup>H NMR (DMSO-d<sub>6</sub>) compound 6b

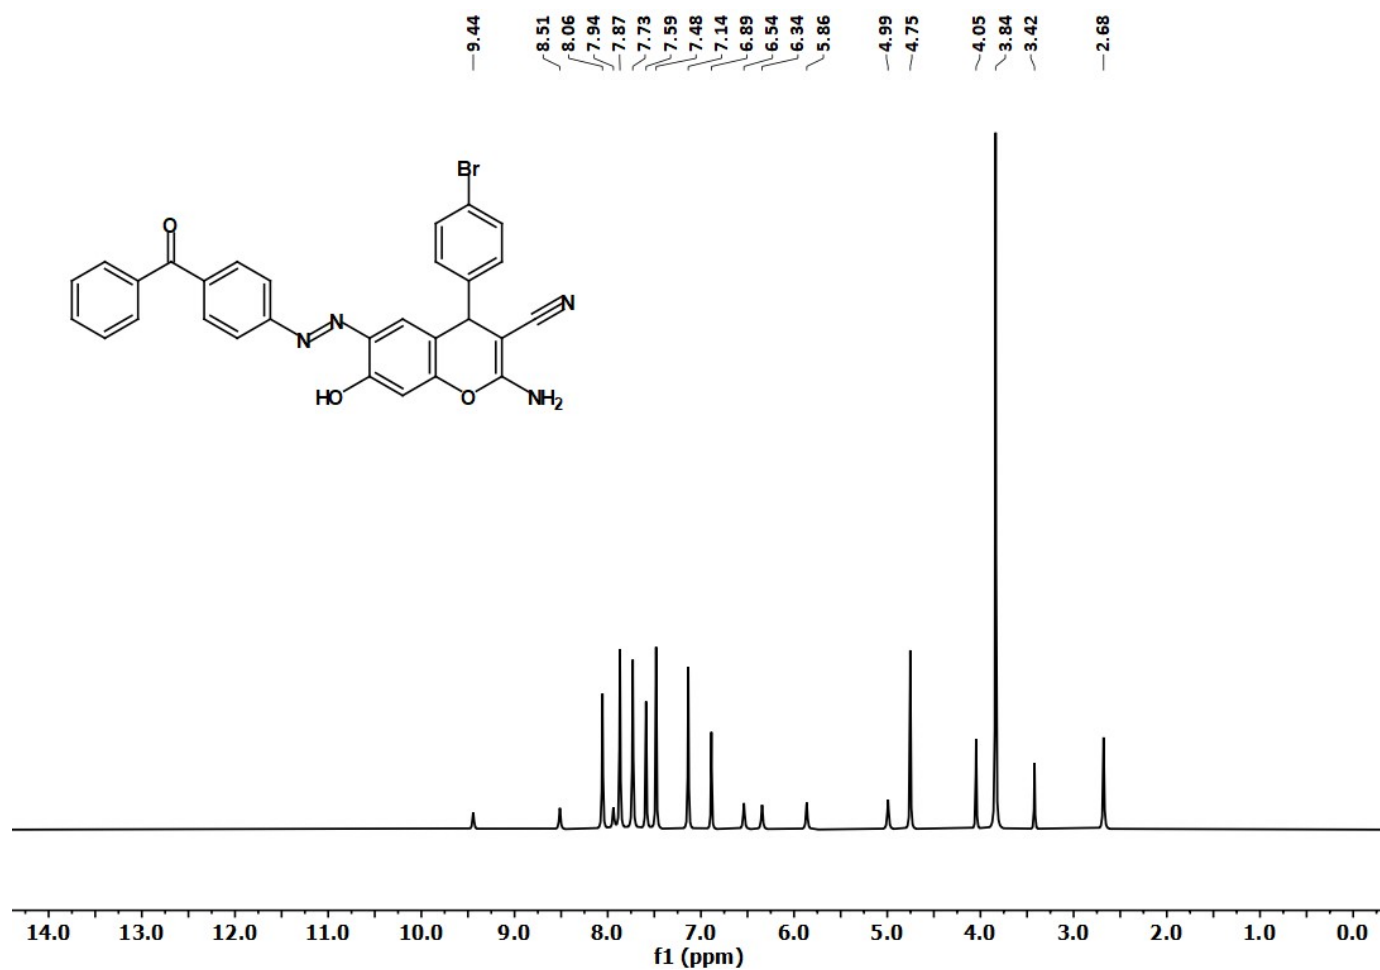

Figure S8: <sup>1</sup>H NMR/D<sub>2</sub>O (DMSO-d<sub>6</sub>) compound 6b



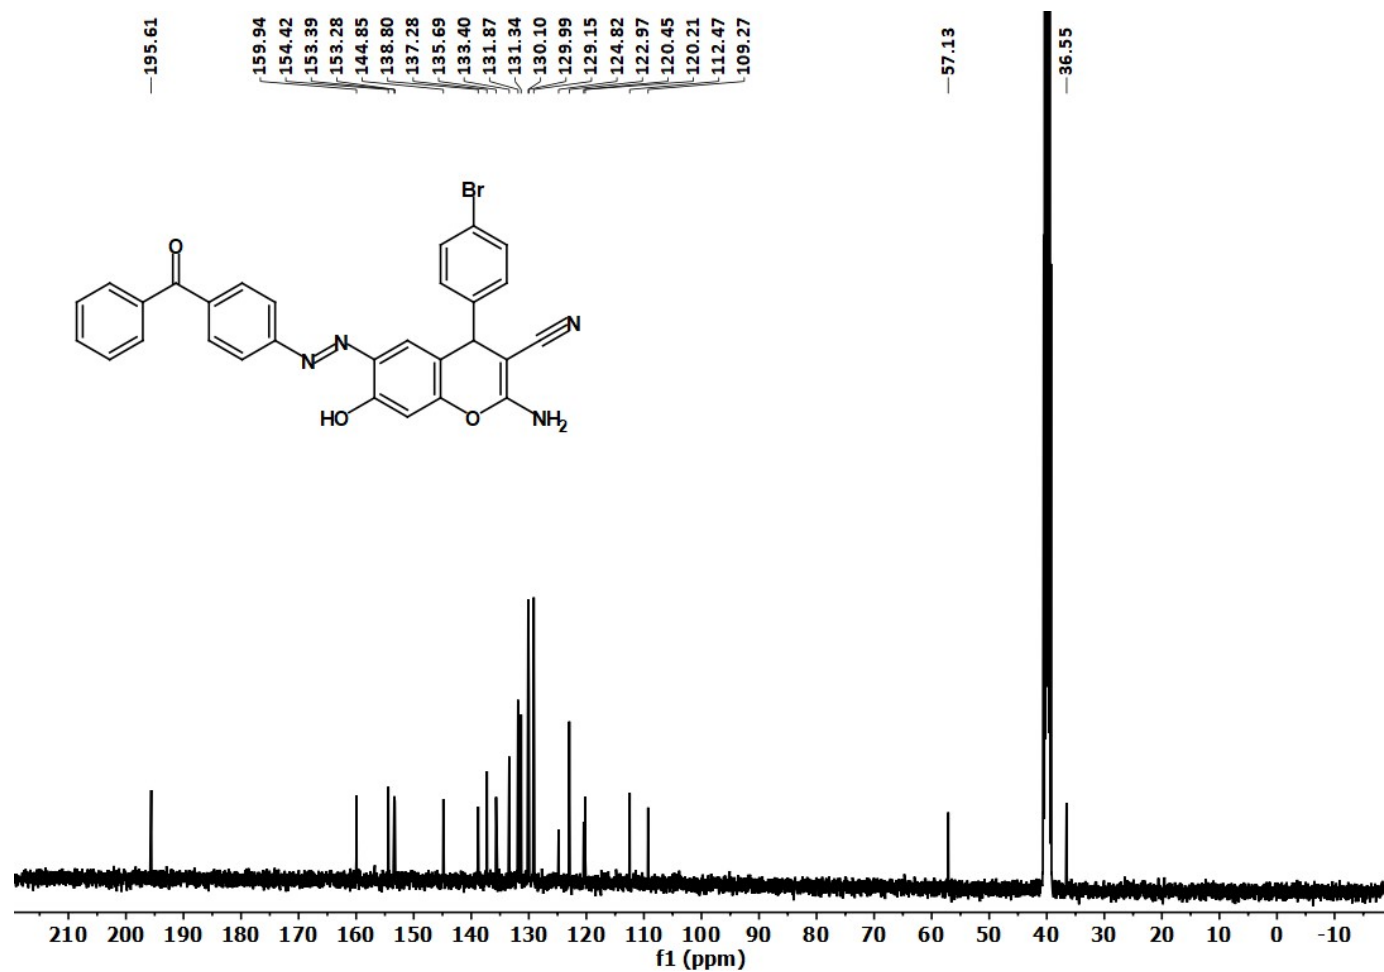

Figure S9:  $^{13}\text{C}$  NMR (DMSO- $\text{d}_6$ ) compound 6b

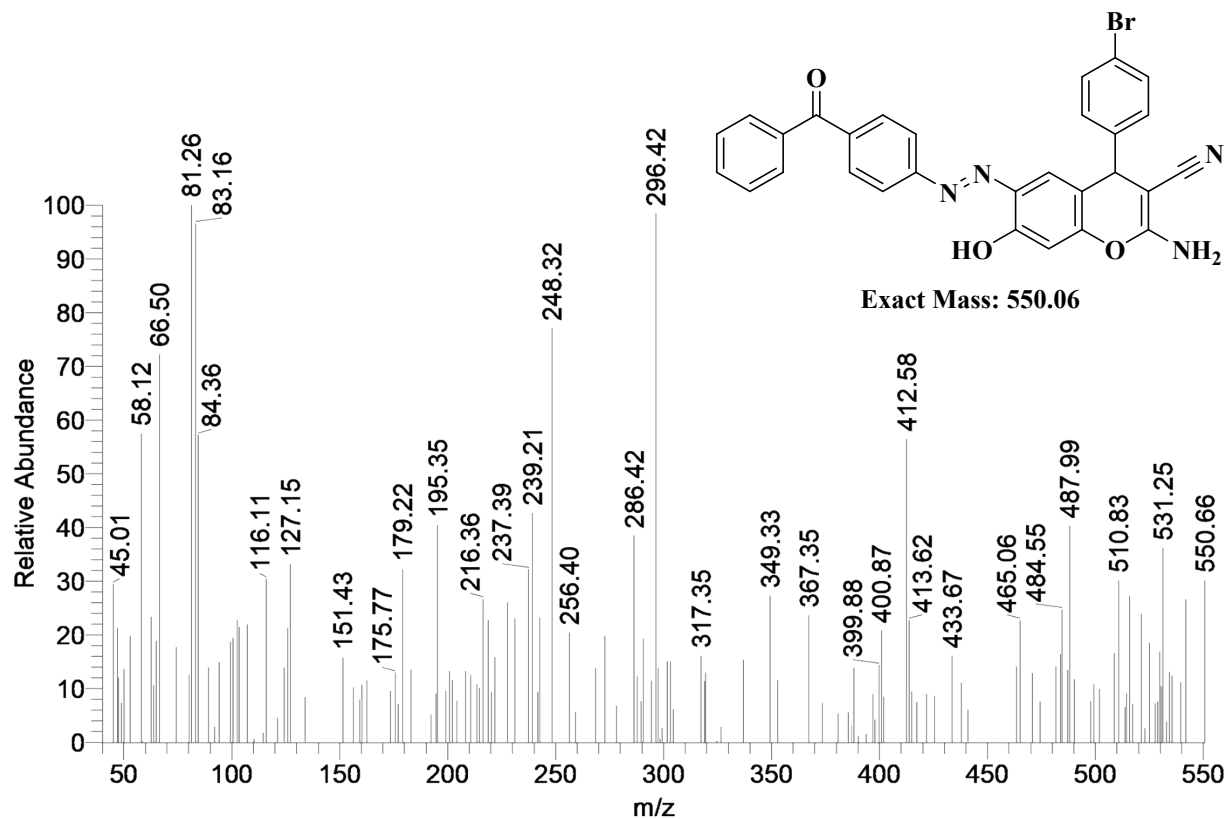

Figure S10: Mass spectrum compound 6b

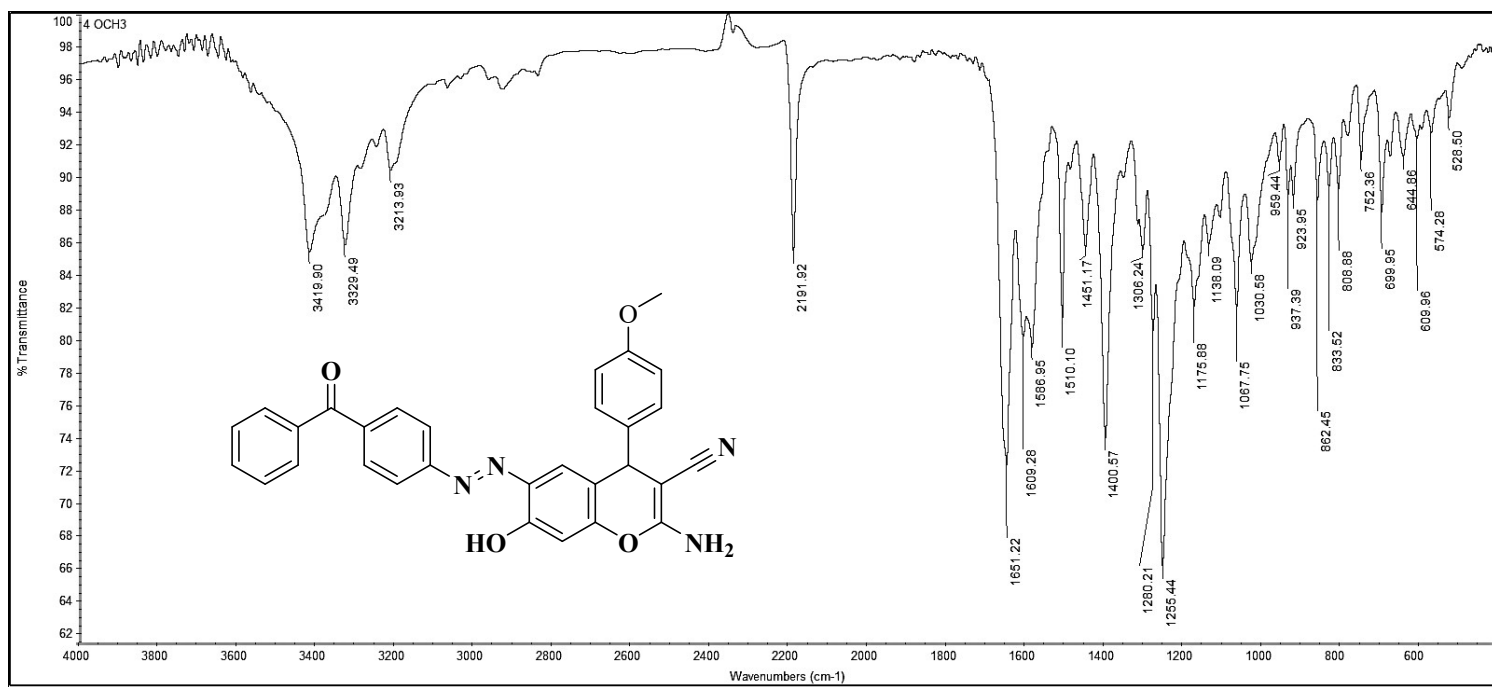

Figure S11: FTIR of compound 6c

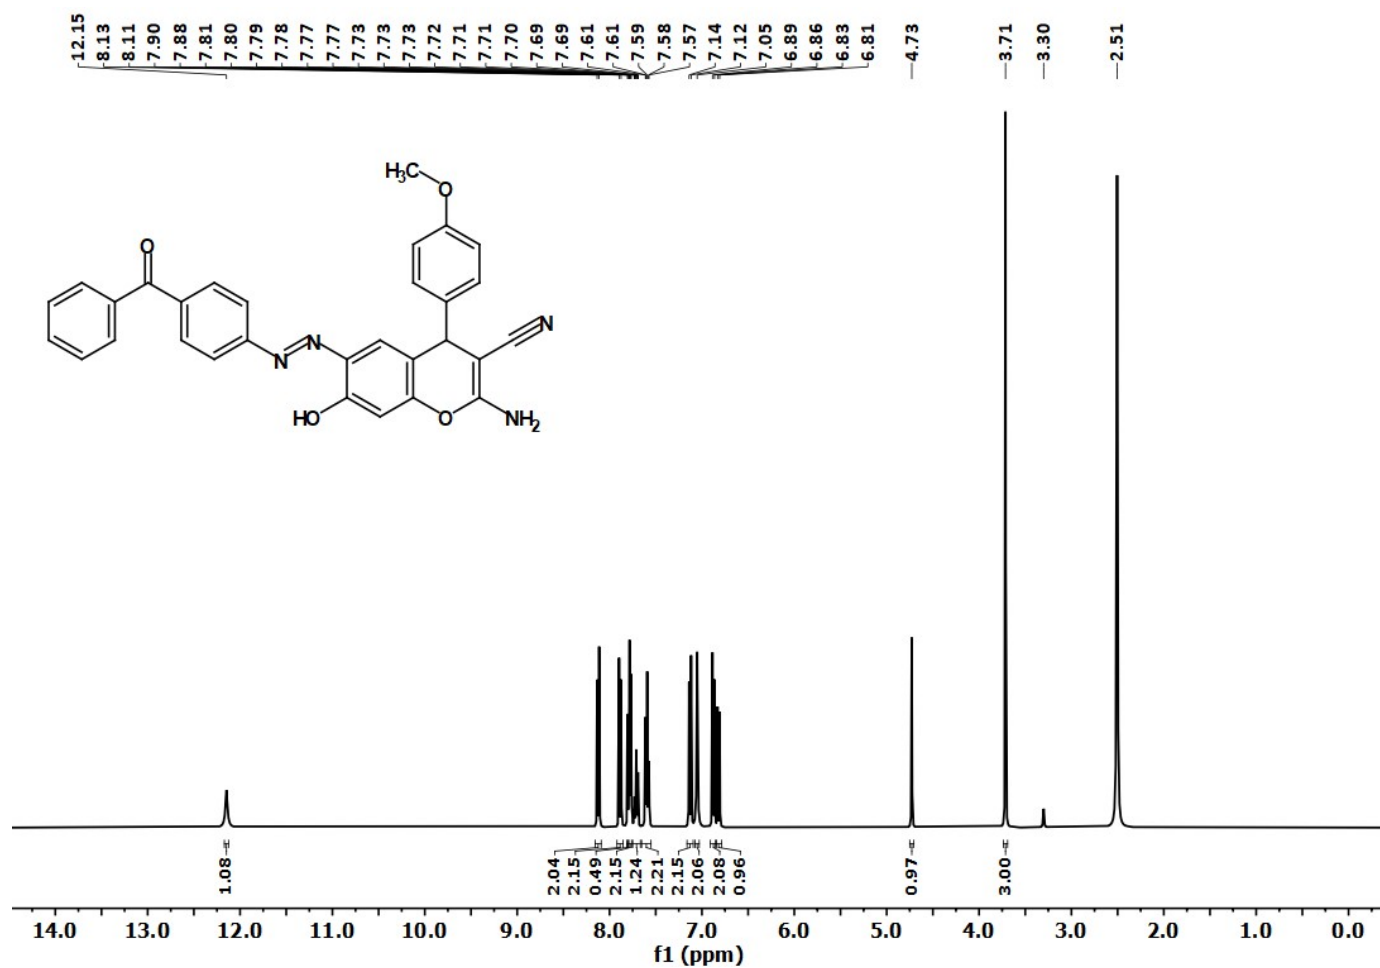

Figure S12: <sup>1</sup>H NMR (DMSO-d<sub>6</sub>) compound 6c

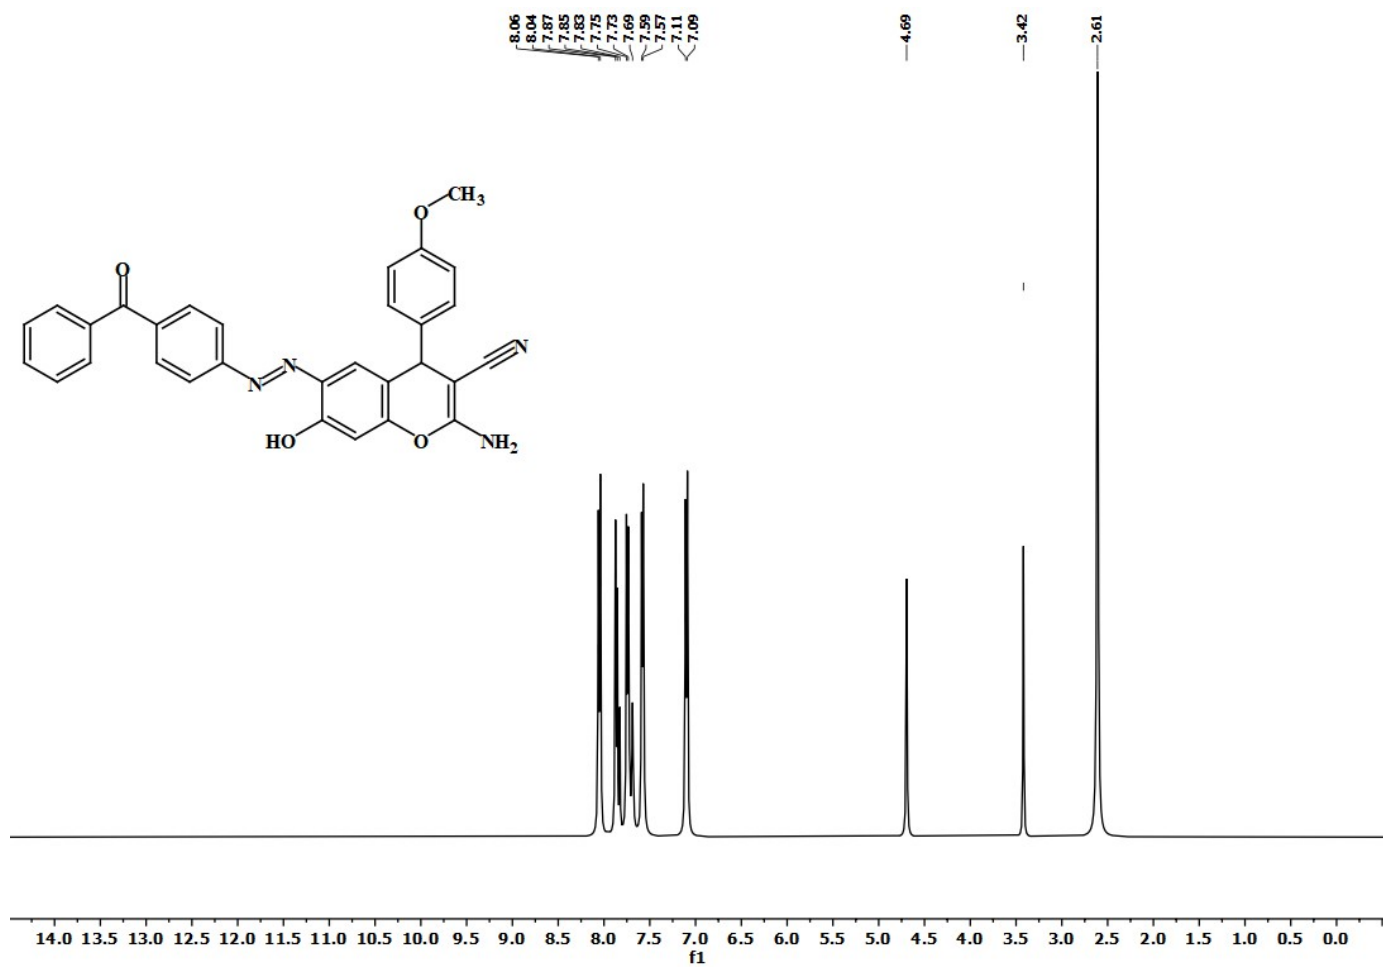

Figure S13: <sup>1</sup>H NMR/D<sub>2</sub>O (DMSO-d<sub>6</sub>) compound 6c

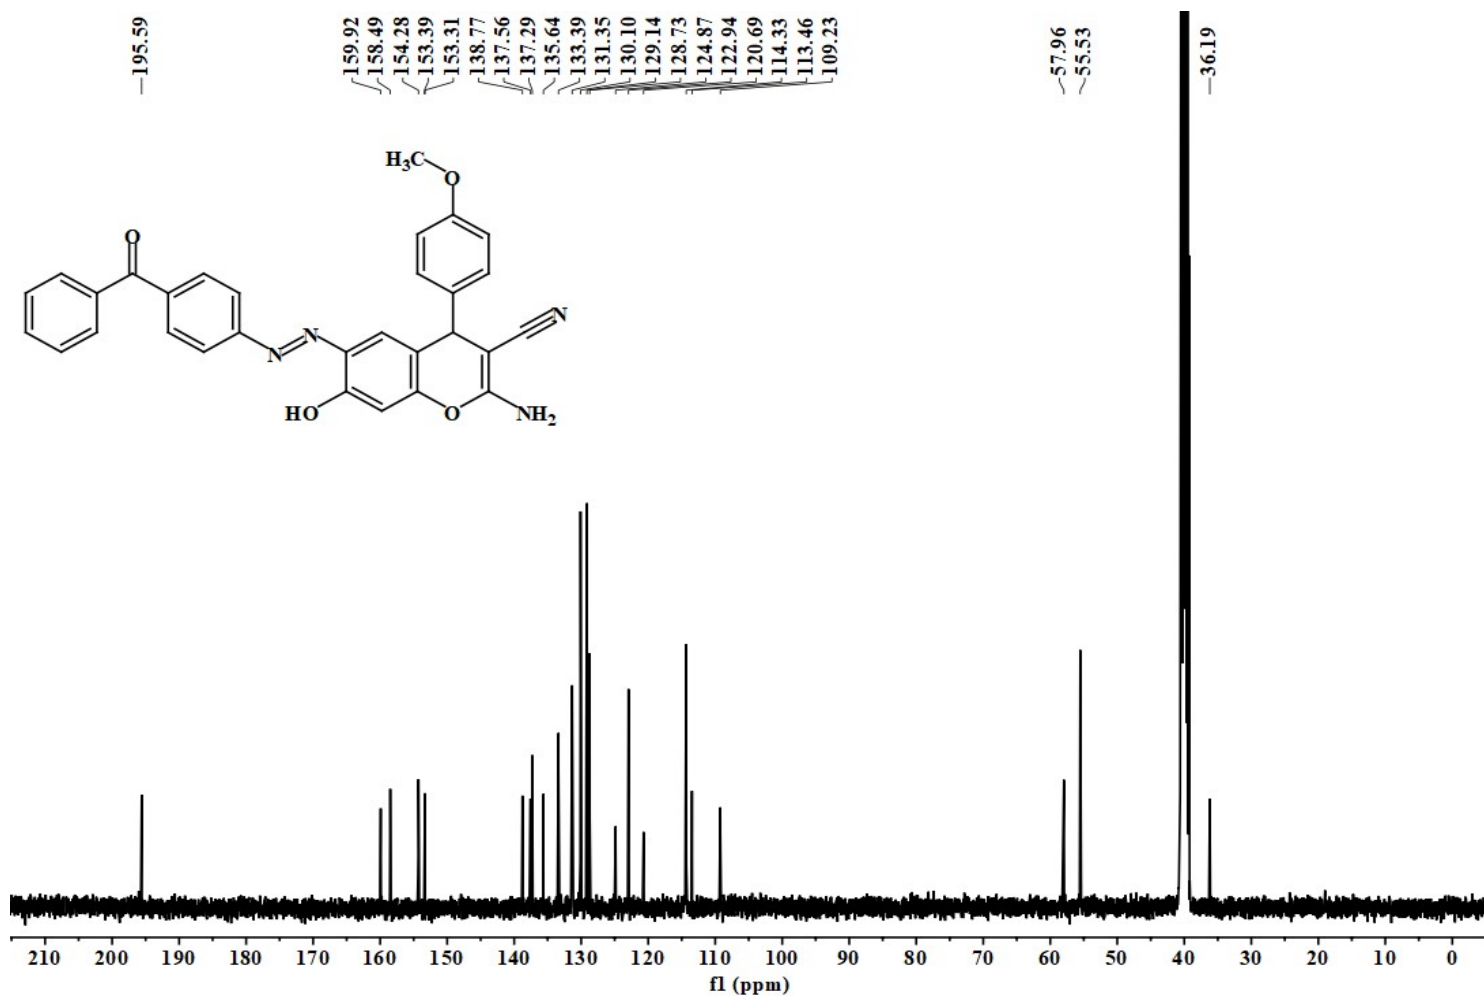

Figure S14: <sup>13</sup>C NMR (DMSO-d<sub>6</sub>) compound 6c

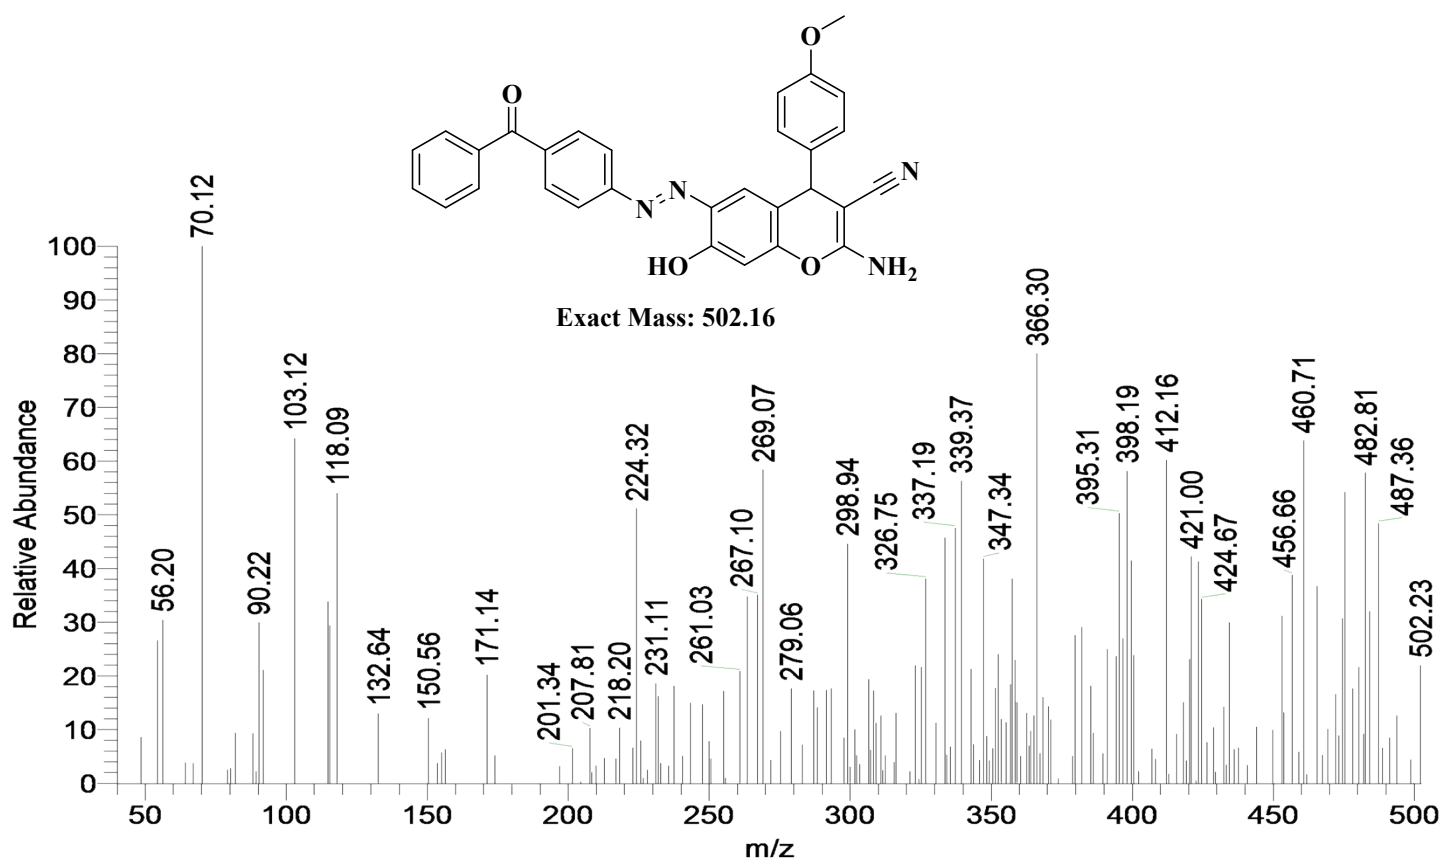

Figure S15: Mass spectrum compound 6c

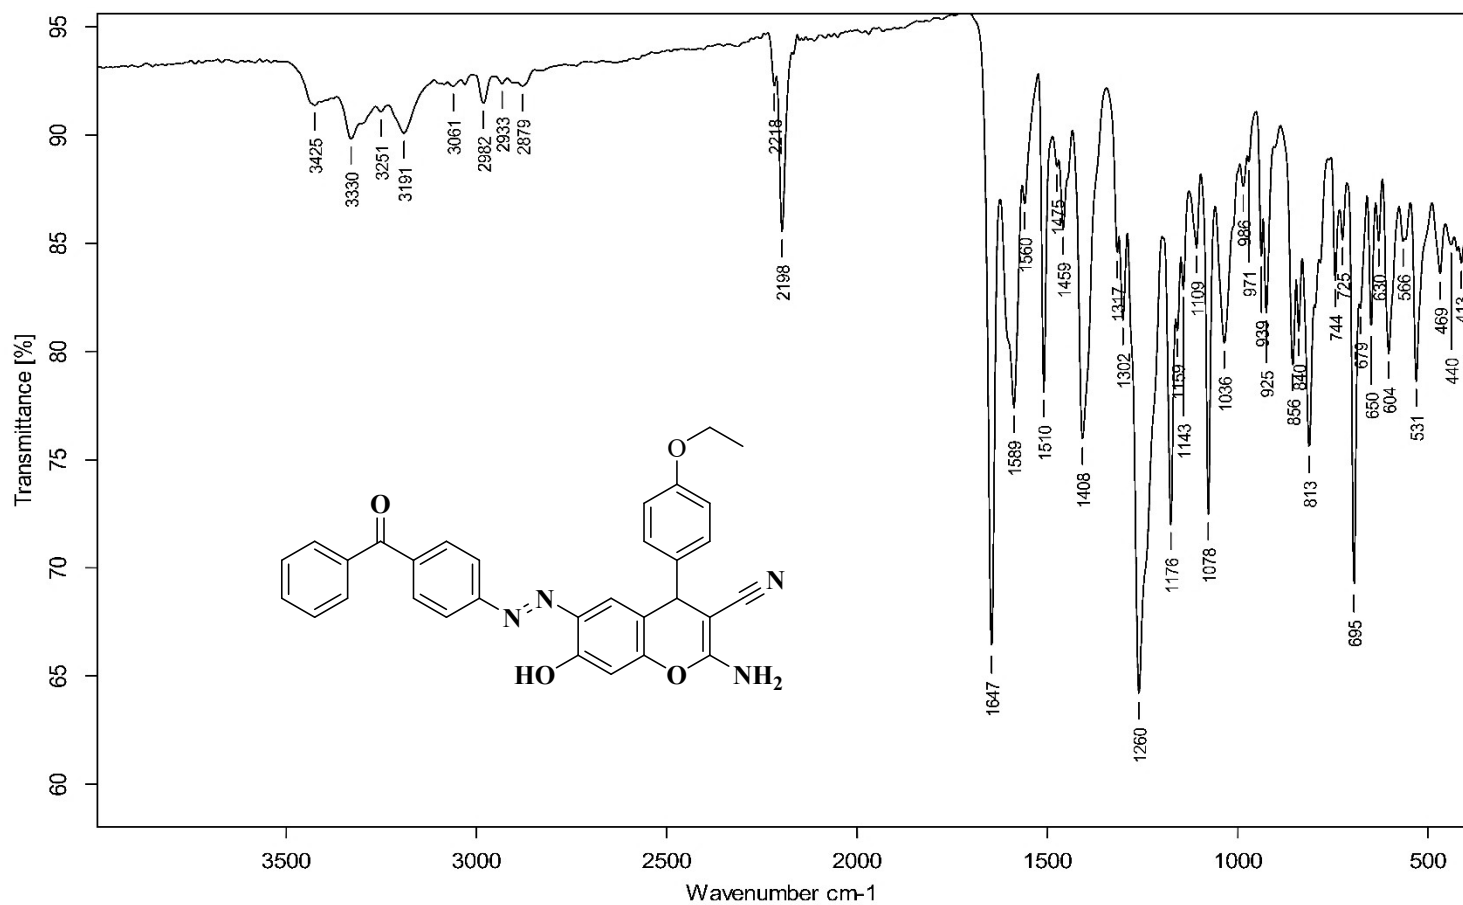

**Figure S16: FTIR of compound 6d**



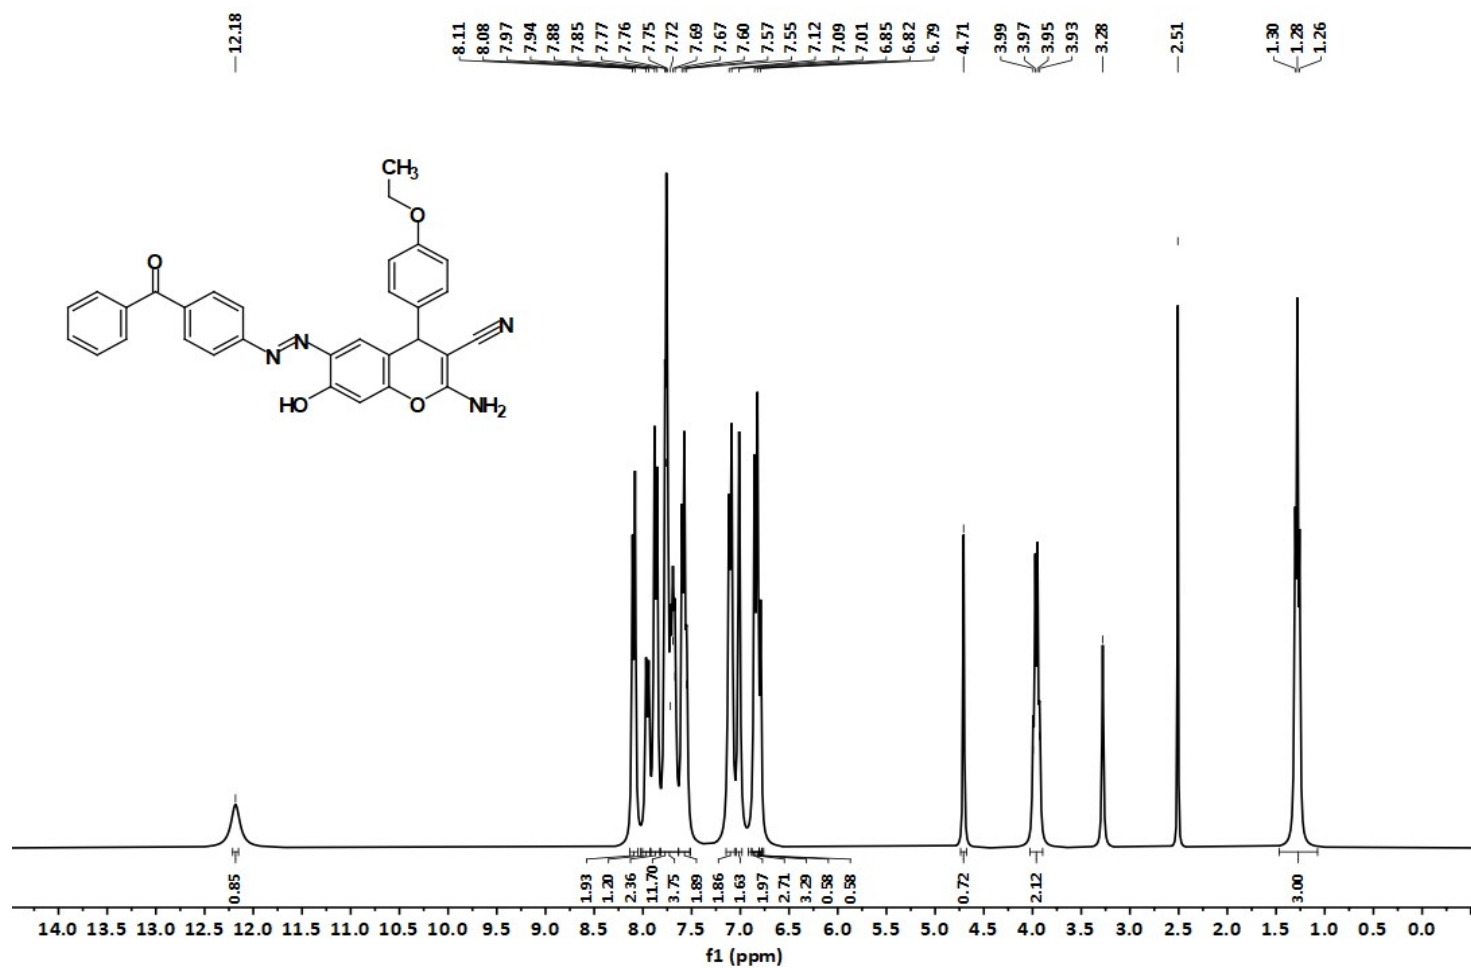

Figure S17: <sup>1</sup>H NMR (DMSO-d<sub>6</sub>) compound 6d

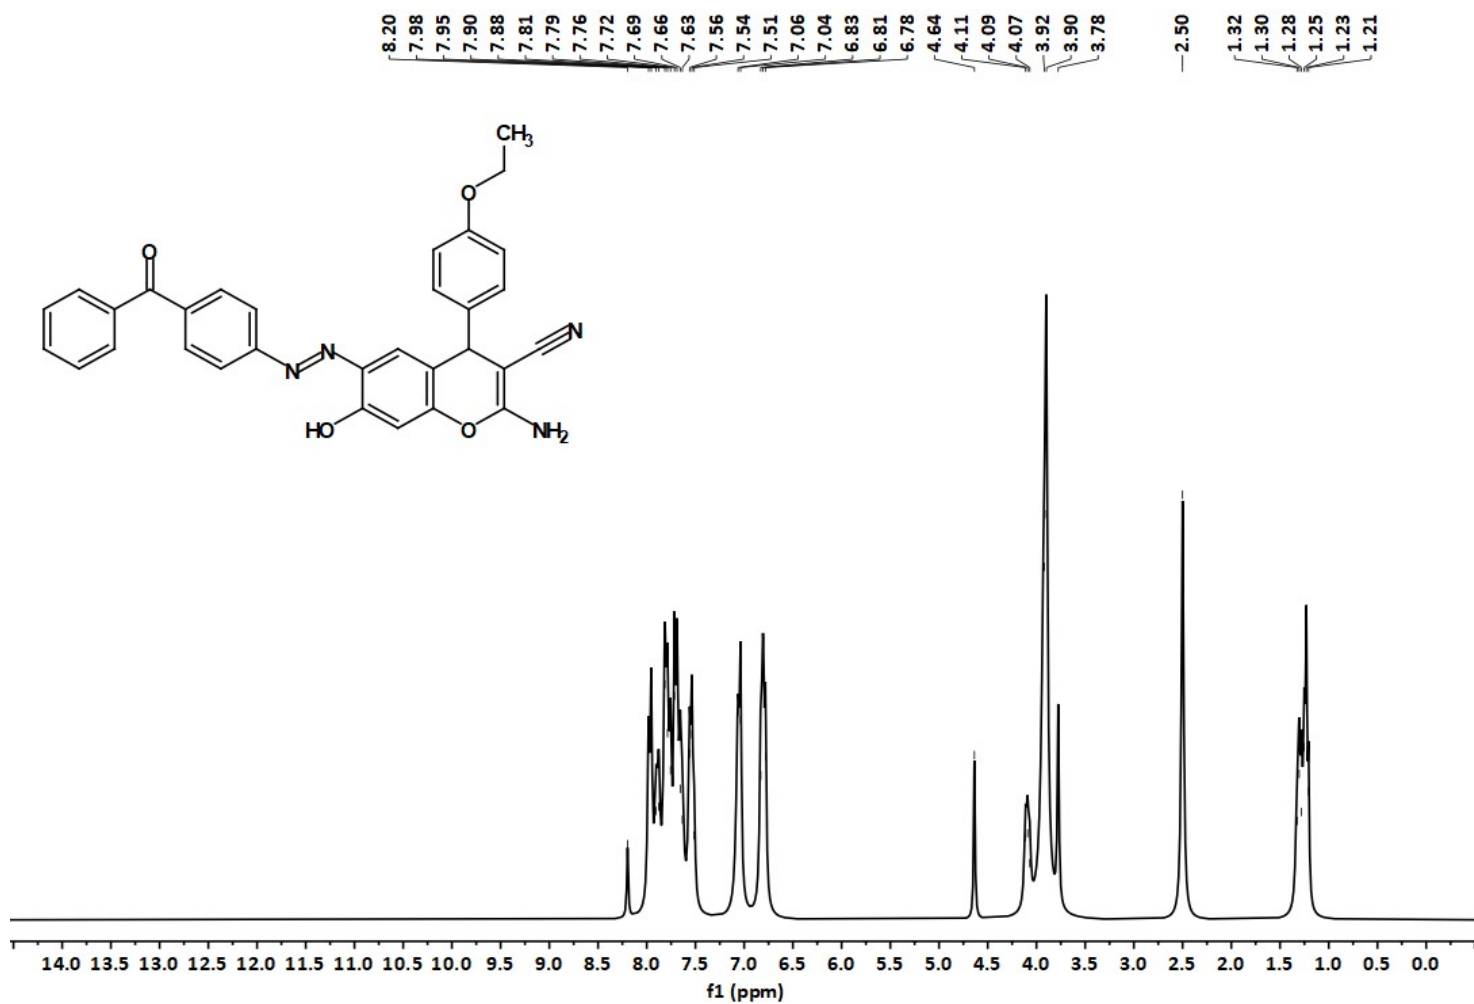

Figure S18:  $^1\text{H}$  NMR/ $\text{D}_2\text{O}$  (DMSO- $d_6$ ) compound 6d

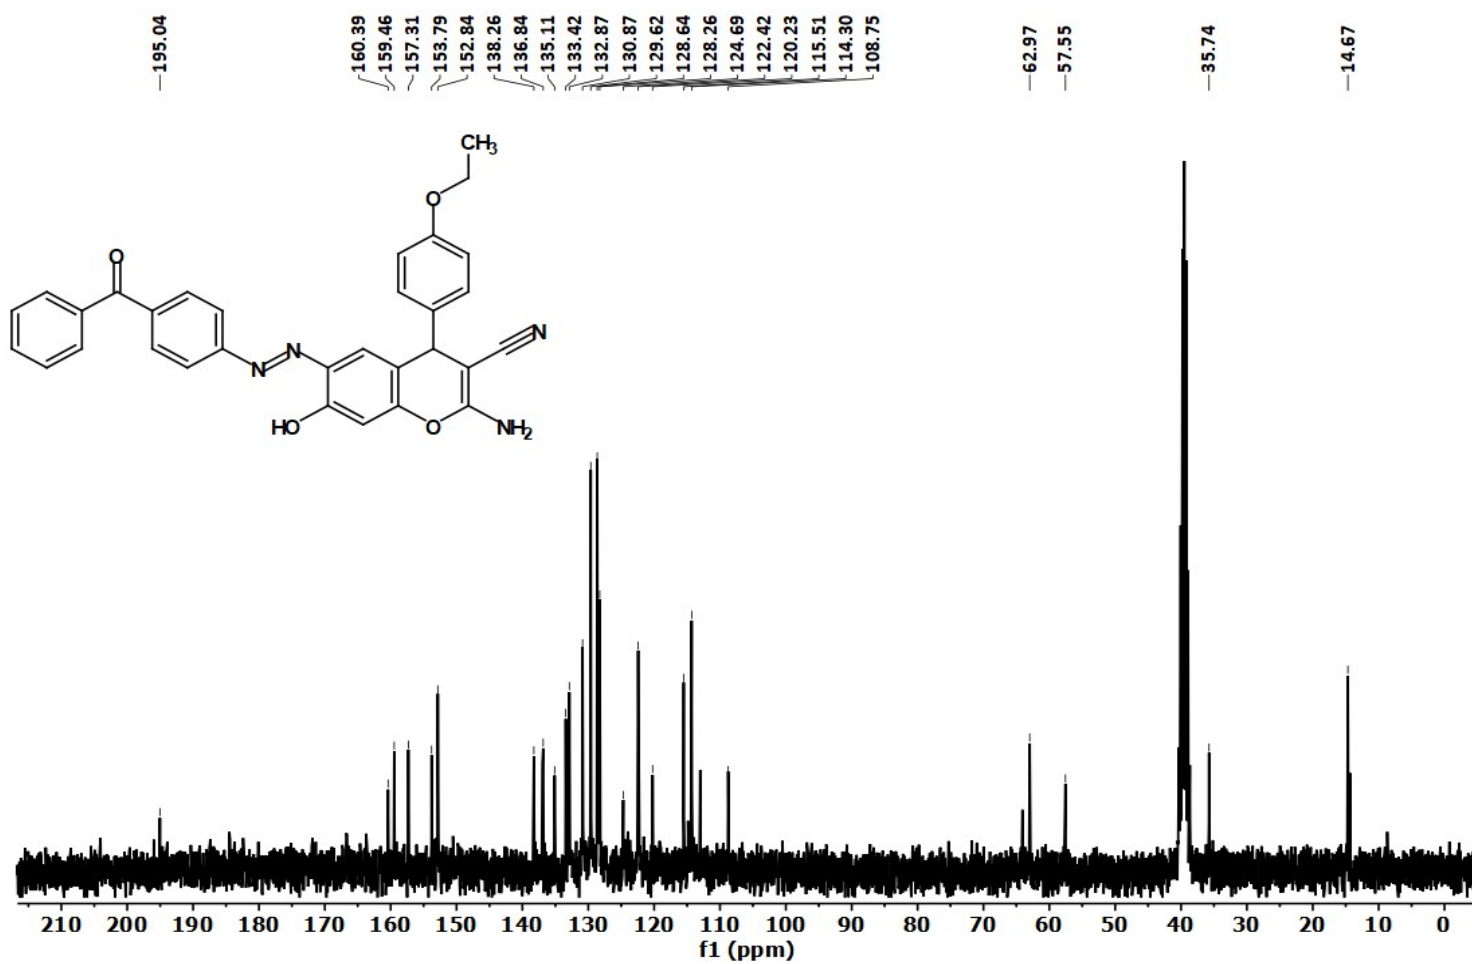

Figure S19: <sup>13</sup>C NMR (DMSO-d<sub>6</sub>) compound 6d

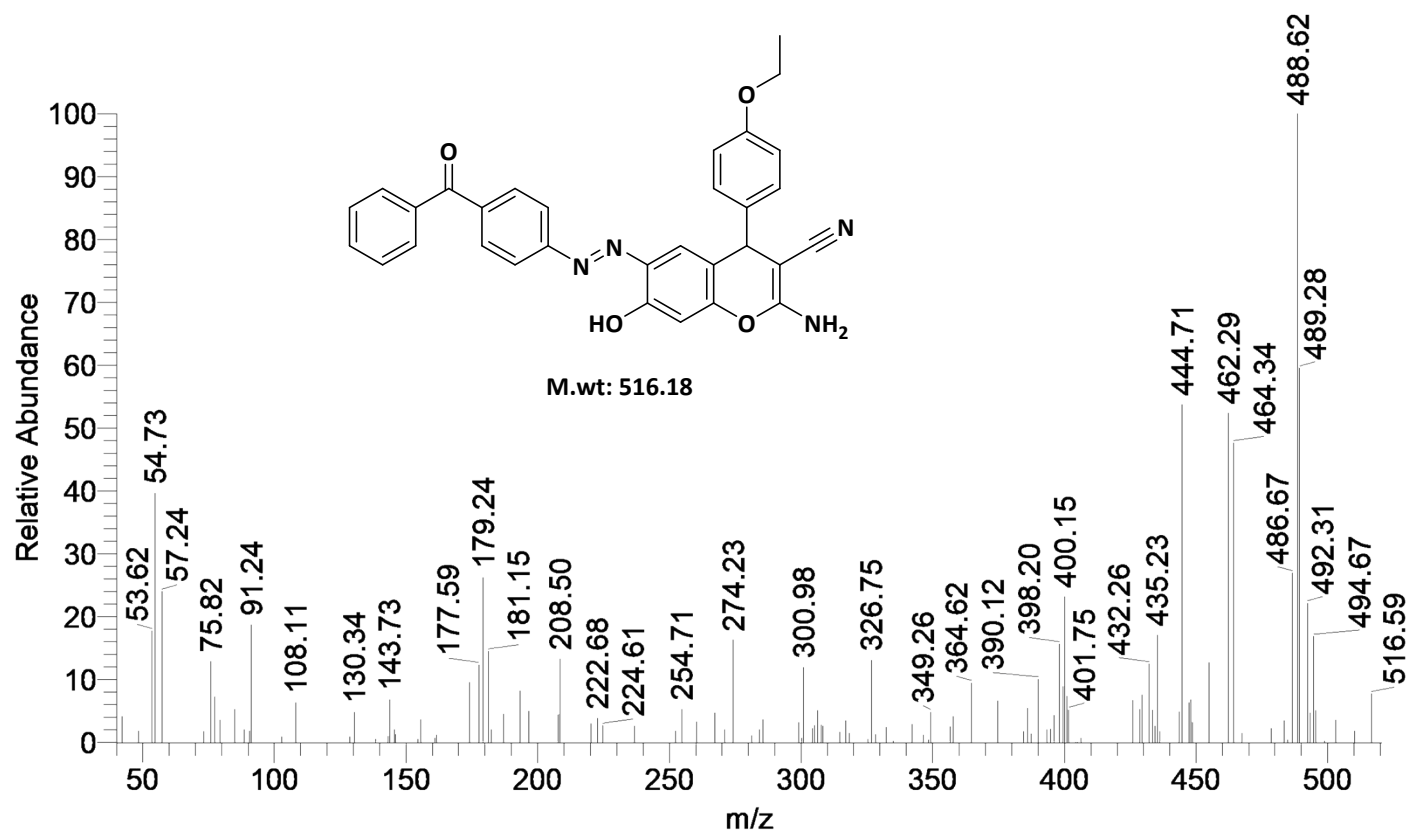

Figure S20: Mass spectrum compound 6d
